# Supplementary material for: Cysteine-Altering NOTCH3 Variants Are a Risk Factor for Stroke in the Elderly Population
Source: PubMed Central journal article supplement — Stroke. 2020 Nov 9;51(12):3562–9. doi: 10.1161/STROKEAHA.120.030343 (PMC7678653; doi:10.1161/strokeaha.120.030343), 2020-11-09
Supplement: str-51-3562-s001.pdf [file str-51-3562-s001.pdf]

## **SUPPLEMENTAL MATERIAL**

### **Cysteine-altering *NOTCH3* variants are a risk factor for stroke in the elderly population**

Remco J. Hack, MD, MSc<sup>1</sup>; Julie W. Rutten, MD, PhD<sup>1</sup>; Thomas N. Person, MSc<sup>2</sup>; Jiang Li, MD, PhD<sup>3</sup>; Ayesha Khan, MD<sup>4</sup>; Christoph J. Griessenauer, MD<sup>4,5</sup>; Regeneron Genetics Center<sup>6</sup>; Vida Abedi, PhD, MSc<sup>3</sup>; Saskia A.J. Lesnik Oberstein, MD, PhD<sup>1†</sup>; Ramin Zand, MD, MPH<sup>4†</sup>.

1. Department of Clinical Genetics, Leiden University Medical Center, Leiden, the Netherlands
2. Geisinger Genomic Medicine Institute, Geisinger, Danville, Pennsylvania, USA
3. Department of Molecular and Functional Genomics, Geisinger, Danville, Pennsylvania, USA
4. Neuroscience Institute, Geisinger, Danville, Pennsylvania, USA
5. Institute of Neurointervention, Paracelsus Medical University, Salzburg, Austria
6. Regeneron Genetics Center, Tarrytown, New York, USA

† Shared last authors

#### **First corresponding author:**

Saskia A.J. Lesnik Oberstein, MD, PhD  
Associate Professor Clinical Neurogenetics  
Leiden University Medical Center  
Albinusdreef 2, 2333 ZA Leiden, The Netherlands  
Telephone: +31 715268033  
Email: [lesnik@lumc.nl](mailto:lesnik@lumc.nl)

#### **Second corresponding author:**

Ramin Zand, MD, MPH  
Associate Professor Neurology  
Neuroscience Institute, Geisinger  
100 N Academy Ave, PA 17822, Danville, USA  
Telephone: +1 5702716211  
Email: [rzand@geisinger.edu](mailto:rzand@geisinger.edu)

**Supplemental Table I. *NOTCH3*<sup>cys</sup> variants in DiscovEHR.**

| Nucleotide alteration                                                                   | Protein alteration | Exon | EGFr domain | Frequency in DiscovEHR | Frequency in gnomAD | Frequency in UK Biobank <sup>21</sup> | Reported in CADASIL pedigrees <sup>5</sup> |
|-----------------------------------------------------------------------------------------|--------------------|------|-------------|------------------------|---------------------|---------------------------------------|--------------------------------------------|
| c.602G>C                                                                                | p.Cys201Ser        | 4    | 5           | 1                      | 0                   | 0                                     | n                                          |
| c.1474A>T                                                                               | p.Ser492Cys        | 9    | 12          | 1                      | 0                   | 0                                     | n                                          |
| c.1531T>C                                                                               | p.Cys511Arg        | 10   | 13          | 1                      | 0                   | 0                                     | y                                          |
| c.1630C>T                                                                               | p.Arg544Cys        | 11   | 13-14       | 1                      | 83                  | 2                                     | y                                          |
| c.1732C>T                                                                               | p.Arg578Cys        | 11   | 14          | 1                      | 10                  | 2                                     | y                                          |
| c.1817G>A                                                                               | p.Cys606Tyr        | 11   | 15          | 1                      | 0                   | 0                                     | n                                          |
| c.1819C>T                                                                               | p.Arg607Cys        | 11   | 15          | 4                      | 1                   | 1                                     | y                                          |
| c.1903C>T                                                                               | p.Arg635Cys        | 12   | 16          | 4                      | 2                   | 0                                     | n                                          |
| c.1960T>G                                                                               | p.Cys654Gly        | 13   | 16          | 1                      | 0                   | 1                                     | n                                          |
| c.1999G>T                                                                               | p.Gly667Cys        | 13   | 17          | 1                      | 1                   | 0                                     | y                                          |
| c.2149C>T                                                                               | p.Arg717Cys        | 14   | 18          | 2                      | 10                  | 0                                     | y                                          |
| c.2182C>T                                                                               | p.Arg728Cys        | 14   | 18          | 2                      | 2                   | 1                                     | y                                          |
| c.2498T>G                                                                               | p.Phe833Cys        | 16   | 21          | 1                      | 0                   | 0                                     | n                                          |
| c.2729G>A                                                                               | p.Cys910Tyr        | 17   | 23          | 1                      | 0                   | 0                                     | n                                          |
| c.2747A>G                                                                               | p.Tyr916Cys        | 17   | 23          | 1                      | 0                   | 0                                     | n                                          |
| c.2817T>G                                                                               | p.Cys939Trp        | 18   | 24          | 1                      | 0                   | 0                                     | n                                          |
| c.3016C>T                                                                               | p.Arg1006Cys       | 19   | 26          | 1                      | 0                   | 0                                     | y                                          |
| c.3209G>C                                                                               | p.Cys1070Ser       | 20   | 27          | 1                      | 0                   | 0                                     | n                                          |
| c.3298C>T                                                                               | p.Arg1100Cys       | 20   | 28          | 1                      | 0                   | 0                                     | n                                          |
| c.3427C>T                                                                               | p.Arg1143Cys       | 21   | 29          | 6                      | 5                   | 0                                     | y                                          |
| c.3431A>G                                                                               | p.Tyr1144Cys       | 21   | 29          | 2                      | 0                   | 0                                     | n                                          |
| c.3568C>T                                                                               | p.Arg1190Cys       | 22   | 30          | 7                      | 15                  | 2                                     | n                                          |
| c.3601C>T                                                                               | p.Arg1201Cys       | 22   | 30          | 4                      | 10                  | 3                                     | n                                          |
| c.3691C>T                                                                               | p.Arg1231Cys       | 22   | 31          | 84                     | 225                 | 33                                    | y                                          |
| c.3696C>G                                                                               | p.Cys1232Trp       | 22   | 31          | 1                      | 0                   | 0                                     | n                                          |
| <b>Total number of individuals with <i>NOTCH3</i><sup>cys</sup> variant in database</b> |                    |      |             | <b>131</b>             | <b>452</b>          | <b>108</b>                            | <b>N/A</b>                                 |
