# Supplementary material for: Cysteine-Altering NOTCH3 Variants Are a Risk Factor for Stroke in the Elderly Population
Source: PubMed Central journal article supplement — Stroke. 2020 Nov 9;51(12):3562–9. doi: 10.1161/STROKEAHA.120.030343 (PMC7678653; doi:10.1161/strokeaha.120.030343), 2020-11-09
Supplement: str-51-3562-s002.pdf [file str-51-3562-s002.pdf]

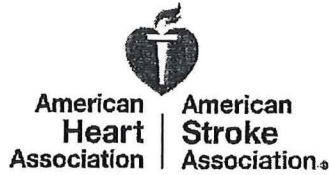

**Acknowledgment Permission Form**

Journal stroke  
 Manuscript Number 030343  
 First Author RJ Hack  
 Title of Work Cysteine-altering NOTCH3 variants are a risk factor for stroke in the elderly population

Authors must provide written permission/approval from all individuals mentioned by name in the Acknowledgments section of a submitted manuscript. By signing this form, any and all acknowledged persons therefore state that they have read and approved the mention of their names in the Acknowledgment section of the aforementioned paper.

|           |                       |           |                       |                                                                                        |      |                   |
|-----------|-----------------------|-----------|-----------------------|----------------------------------------------------------------------------------------|------|-------------------|
| Name (1)  | <u>Amy Kolinovsky</u> | Signature | <u>Amy Kolinovsky</u> | <small>Digitally signed by Amy Kolinovsky<br/>Date: 2020.07.29 12:27:44 -0400'</small> | Date | <u>07/29/2020</u> |
| Name (2)  | <u>Muhammed Iqbal</u> | Signature | <u>Muhammed Iqbal</u> |                                                                                        | Date | <u>7/31/20</u>    |
| Name (3)  | <u>Joseph Hornak</u>  | Signature | <u>Joseph Hornak</u>  |                                                                                        | Date | <u>7/31/20</u>    |
| Name (4)  | _____                 | Signature | _____                 |                                                                                        | Date | _____             |
| Name (5)  | _____                 | Signature | _____                 |                                                                                        | Date | _____             |
| Name (6)  | _____                 | Signature | _____                 |                                                                                        | Date | _____             |
| Name (7)  | _____                 | Signature | _____                 |                                                                                        | Date | _____             |
| Name (8)  | _____                 | Signature | _____                 |                                                                                        | Date | _____             |
| Name (9)  | _____                 | Signature | _____                 |                                                                                        | Date | _____             |
| Name (10) | _____                 | Signature | _____                 |                                                                                        | Date | _____             |
| Name (11) | _____                 | Signature | _____                 |                                                                                        | Date | _____             |
| Name (12) | _____                 | Signature | _____                 |                                                                                        | Date | _____             |
| Name (13) | _____                 | Signature | _____                 |                                                                                        | Date | _____             |
| Name (14) | _____                 | Signature | _____                 |                                                                                        | Date | _____             |
| Name (15) | _____                 | Signature | _____                 |                                                                                        | Date | _____             |
| Name (16) | _____                 | Signature | _____                 |                                                                                        | Date | _____             |
| Name (17) | _____                 | Signature | _____                 |                                                                                        | Date | _____             |
| Name (18) | _____                 | Signature | _____                 |                                                                                        | Date | _____             |
| Name (19) | _____                 | Signature | _____                 |                                                                                        | Date | _____             |
| Name (20) | _____                 | Signature | _____                 |                                                                                        | Date | _____             |
